# Supplementary material for: Fibroblast growth factor (FGF) signaling regulates transforming growth factor beta (TGFβ)-dependent smooth muscle cell phenotype modulation
Source: PubMed Central journal article supplement (PMC5025753; doi:10.1038/srep33407), 2016-09-16
Supplement: srep33407-s1.pdf [file srep33407-s1.pdf]

**Fibroblast growth factor (FGF) signaling regulates transforming growth factor beta (TGF $\beta$ )-dependent smooth muscle cell phenotype modulation**

**Pei-Yu Chen, Lingfeng Qin, Guangxin Li, George Tellides, and Michael Simons**

**Supplementary Figures:**

Supplementary Figure S1

Supplementary Figure S2

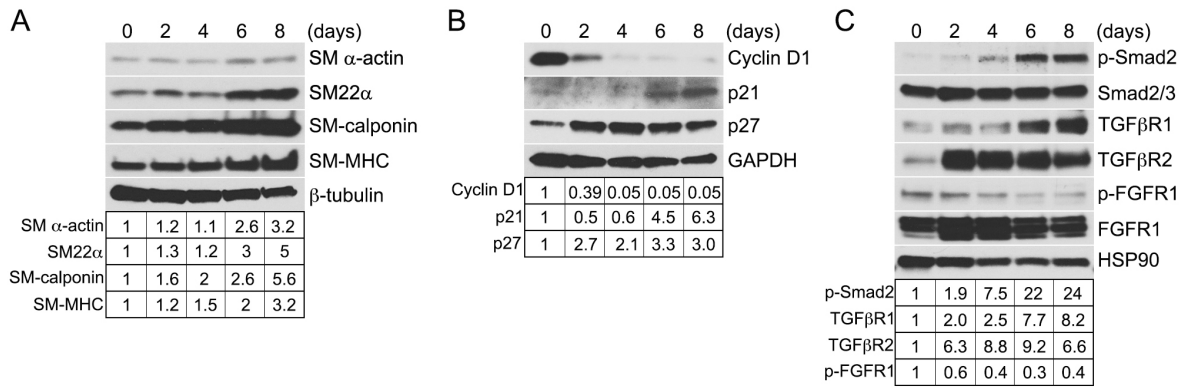

**Supplementary Figure 1: FGF activity is downregulated and TGF $\beta$  signaling is upregulated during primary mouse vascular smooth muscle cell (VSMC) differentiation.**

Mouse VSMCs were cultured in the growth medium (Claycomb + 10% FBS) at day 0 then were switched from growth medium to differentiation medium (DMEM + 0.5% FBS) for 8 days. (A-C) Upper panels: Immunoblot analysis of smooth muscle markers, cell cycle regulators (Cyclin D1, p21, p27), FGF, and TGF $\beta$  pathways in mouse VSMCs. Blots are representative of three independent experiments. Bottom panels: Band intensities of SM  $\alpha$ -actin, SM22 $\alpha$ , SM-calponin, SM-MHC, Cyclin D1, p21, p27, p-Smad2, TGF $\beta$ R1, TGF $\beta$ R2, and p-FGFR1 were normalized to  $\beta$ -tubulin, GAPDH, HSP90, Smad2, or FGFR1 and expressed as a fraction of a control value.

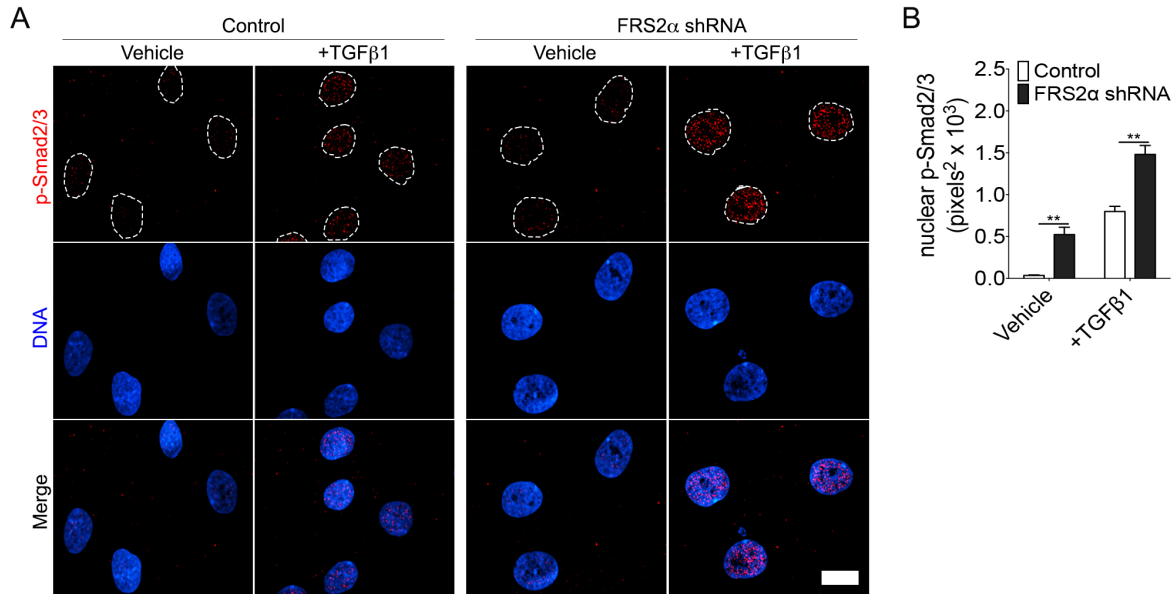

**Supplementary Figure 2: FRS2 $\alpha$  knockdown increases TGF $\beta$  signaling in primary human aortic smooth muscle cells (HASMCs).**

Immunofluorescence staining of phosphorylated Smad2/3 (red) in control and FRS2 $\alpha$  knockdown HASMCs. Nuclei were counterstained with DAPI (blue). Scale bar: 12  $\mu$ m. Control and FRS2 $\alpha$  knockdown HASMCs were serum starved for 8 hr then stimulated with TGF $\beta$ 1 (0.5 ng/ml) for 15 min. Images are representative of three independent experiments.
